# Supplementary material for: Differences in Troponin I and Troponin T Release in High-Performance Athletes Outside of Competition
Source: MDPI journal article supplement (doi:10.3390/ijms25021062), 2024-01-15
Supplement: s1 [file s1]

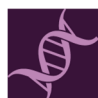

Supplemental Data:

**Table S1.** Individuals per sporting discipline (all/women/men).

|                             |                                    |                                          |
|-----------------------------|------------------------------------|------------------------------------------|
| <i>Biathlon (51/24/27)</i>  | <i>Running (&lt;800m) (4/3/1)</i>  | <i>Wrestling (8/1/7)</i>                 |
| <i>Bobsledge (12/3/9)</i>   | <i>Running (800-1500m) (8/1/7)</i> | <i>Luge (1/0/1)</i>                      |
| <i>Boxing (1/0/1)</i>       | <i>Running (&gt;1500m) (7/3/4)</i> | <i>Rowing (1/1/0)</i>                    |
| <i>Curling (1/1/0)</i>      | <i>Long-jump (1/1/0)</i>           | <i>Shooting (2/0/2)</i>                  |
| <i>Judo (1/1/0)</i>         | <i>Nordic combined (1/0/1)</i>     | <i>Swimming (5/1/4)</i>                  |
| <i>Canoe (race) (9/5/4)</i> | <i>Para-throw (1/0/1)</i>          | <i>XC Skiing (49/24/25)</i>              |
| <i>Karate (1/1/0)</i>       | <i>Para-game sport (1/1/0)</i>     | <i>Ski Jumping (7/7/0)</i>               |
| <i>Discus throw (4/1/3)</i> | <i>Para-triathlon (1/0/1)</i>      | <i>Speedskating (2/0/2)</i>              |
| <i>Race walk (1/1/0)</i>    | <i>Track cycling (2/0/2)</i>       | <i>Triathlon (12/4/8)</i>                |
| <i>Hammer throw (7/5/2)</i> | <i>Mountainbike (1/0/1)</i>        | <i>Water diving (4/2/2)</i>              |
| <i>Shotput (1/0/1)</i>      | <i>Road cycling (2/0/2)</i>        | <i>Fencing (1/0/1)</i>                   |
| <i>Fin swimming (2/0/2)</i> | <i>Handball (4/1/3)</i>            | <i>Track and Field multicom. (1/1/0)</i> |
